# Supplementary material
Source: PubMed Central journal article supplement (PMC7655291)
Supplement: 18-00375.pdf [file 18-00375.pdf]

# High-exposure Cohort

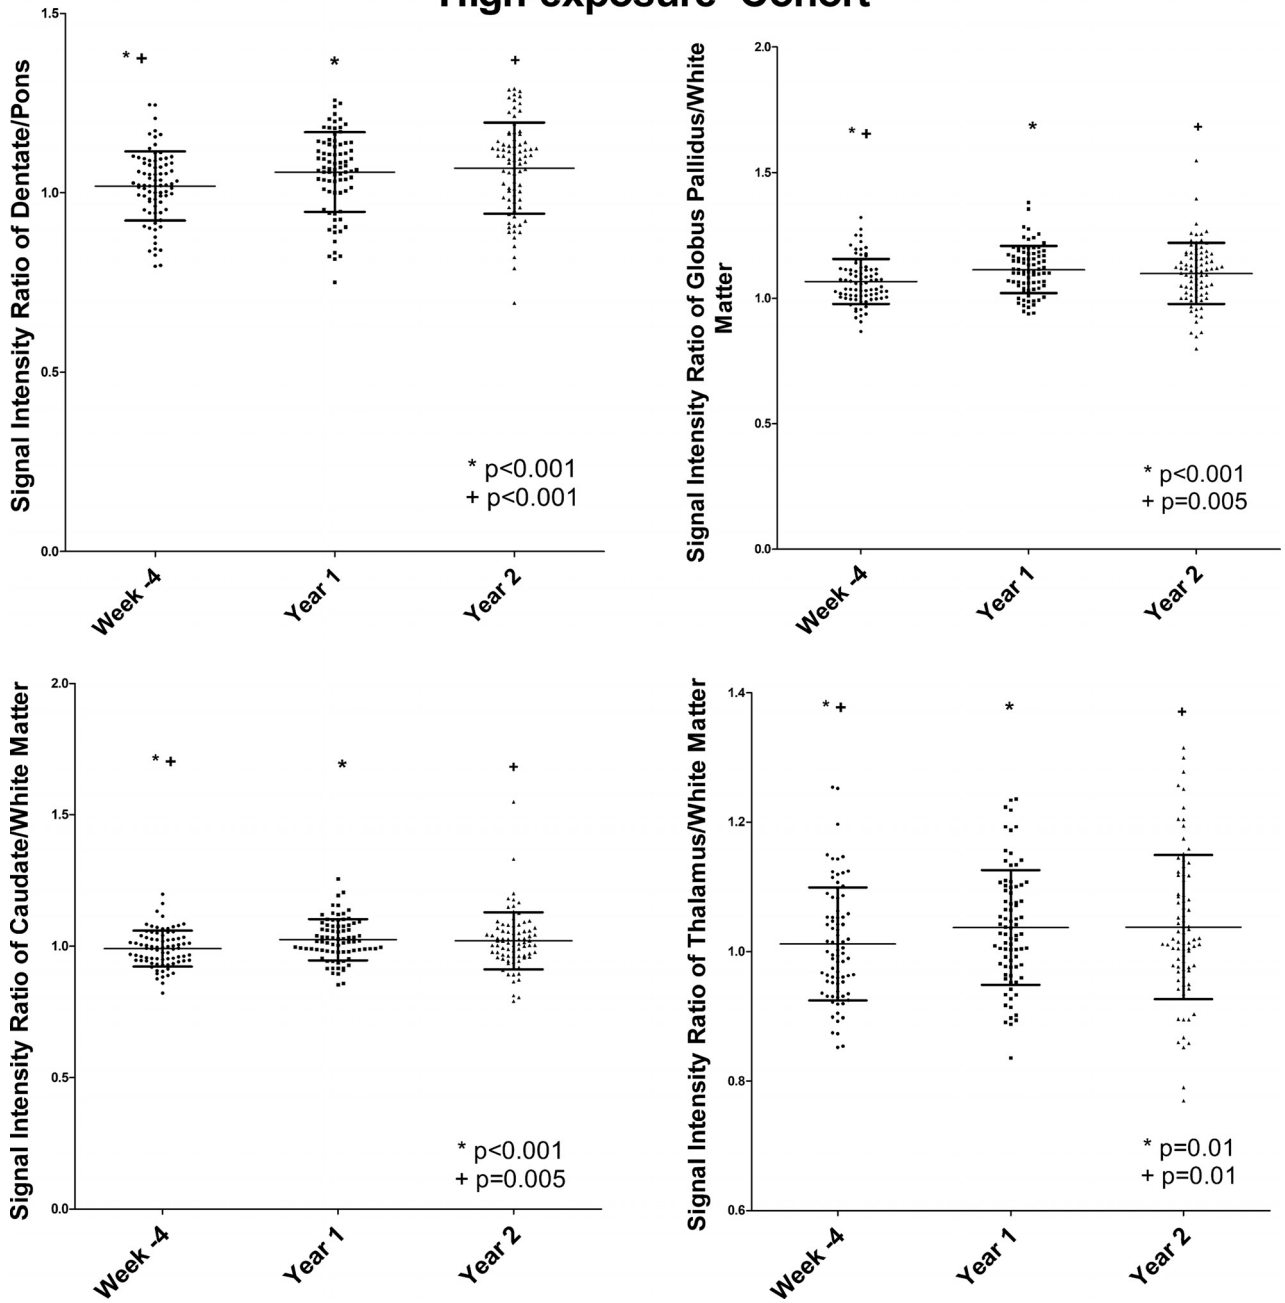

ON-LINE FIG 1. Scatterplot graph of signal intensity ratios for the high-exposure cohort.

## Low-exposure Cohort

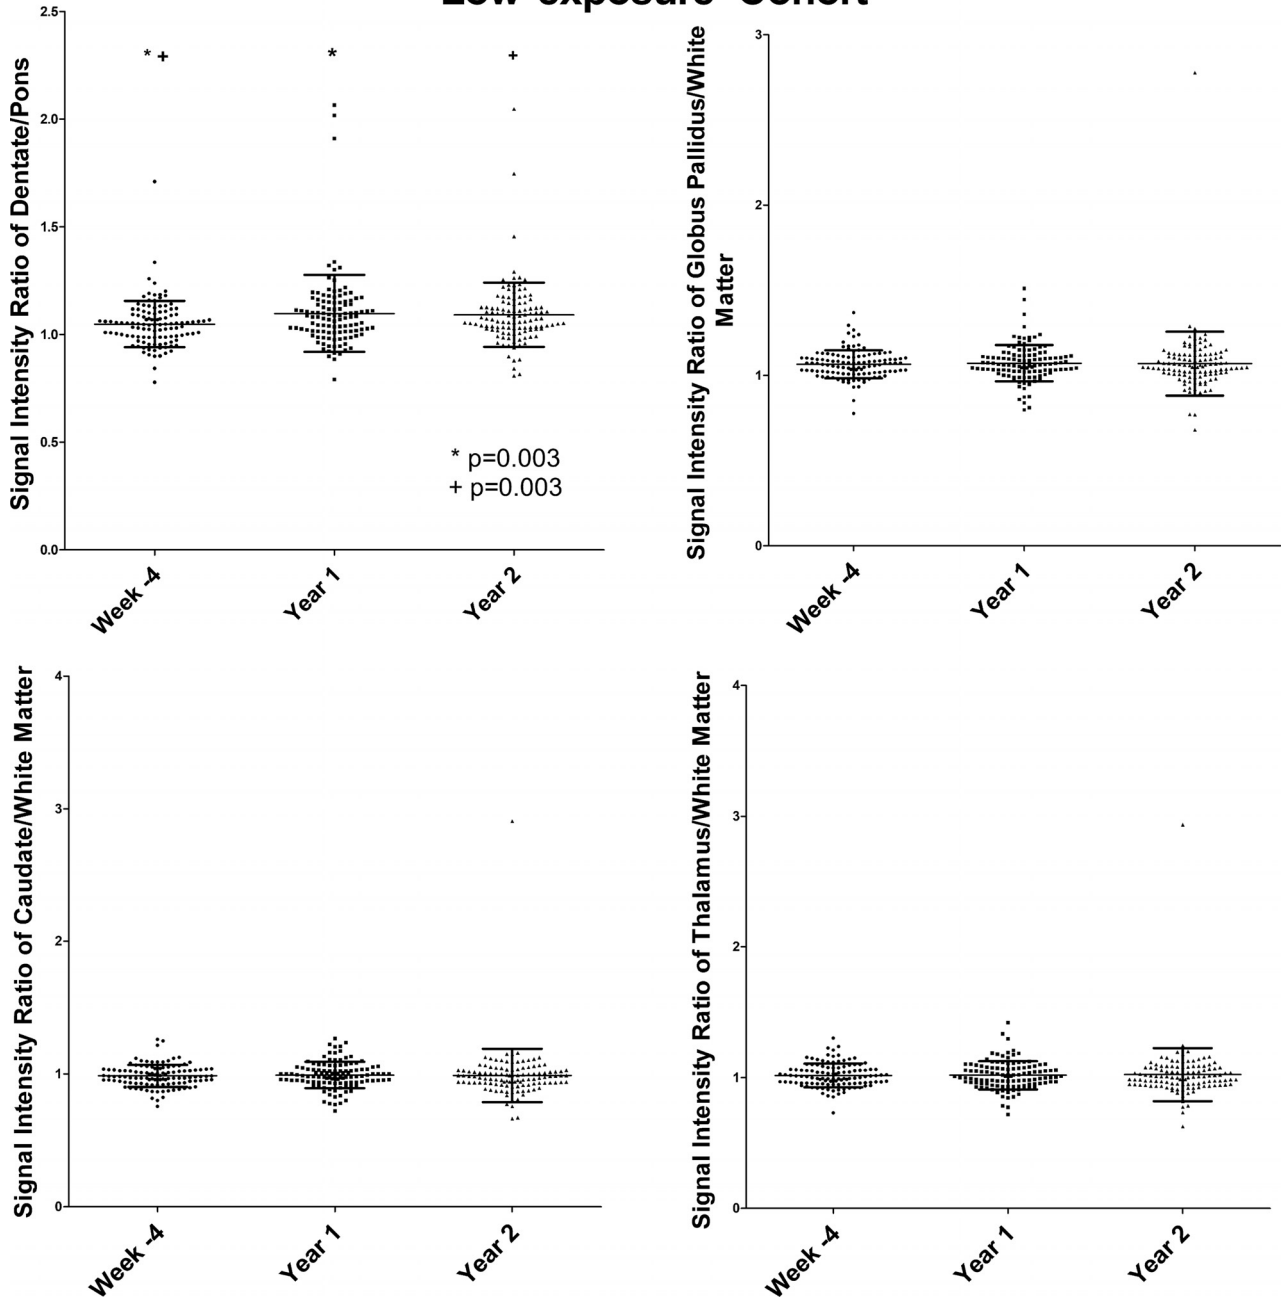

ON-LINE FIG 2. Scatterplot graph of signal intensity ratios for the low-exposure cohort.
